# Supplementary material
Source: Springer Nature journal article supplement (https://www.springermedizin.de/resource/supplementary/12885_2013_4299_MOESM2_ESM.pdf/9467508)
Supplement: MOESM2 [file 9467508]

### Thoracic spine

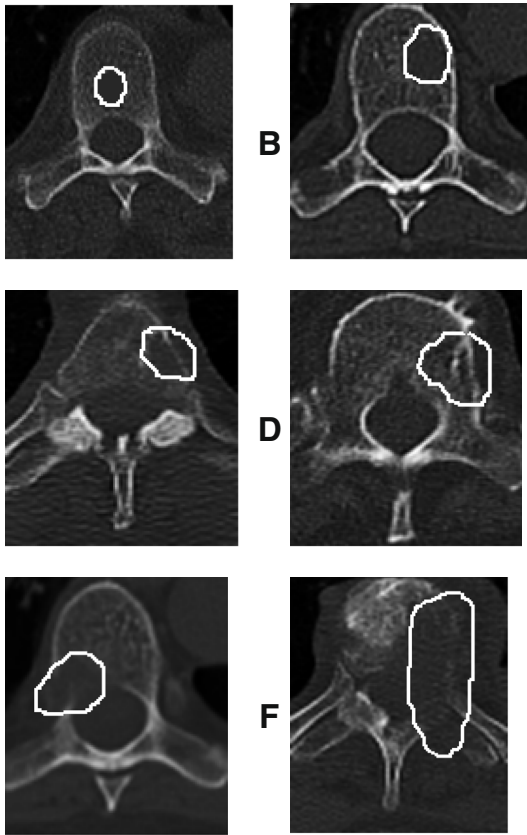

### Lumbar spine

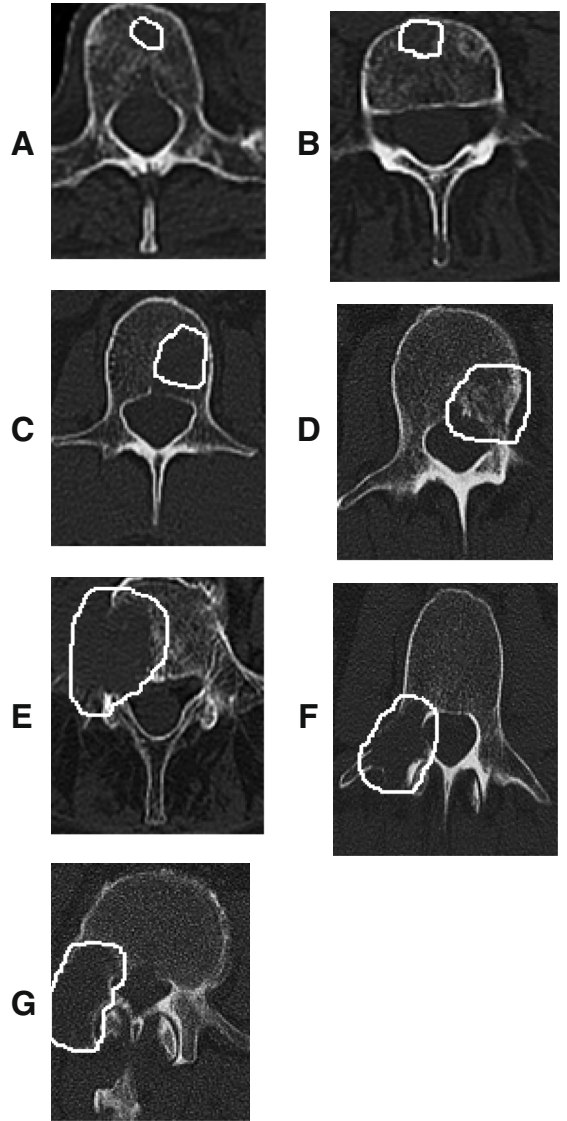

|                                   | A    | B    | C    | D    | E    | F    |
|-----------------------------------|------|------|------|------|------|------|
| Tumor occupancy vertebral body    | 30%  | 60%  | 30%  | 60%  | 30%  | 60%  |
| Costovertebral Joint Destruction  | -    | -    | +    | +    | +    | +    |
| Predicle Destruction              | -    | -    | -    | -    | +    | +    |
| Posterior Elements Destruction    | -    | -    | -    | -    | -    | +    |
| Predicted Probability of Collapse | 0.13 | 0.68 | 0.57 | 0.96 | 0.71 | 0.98 |

|                                   | A    | B    | C    | D    | E    | F    | G    |
|-----------------------------------|------|------|------|------|------|------|------|
| Tumor occupancy vertebral body    | 20%  | 30%  | 40%  | 40%  | 60%  | 5%   | 20%  |
| Predicle Destruction              | -    | -    | -    | +    | +    | +    | +    |
| Posterior Elements Destruction    | -    | -    | -    | -    | +    | +    | +    |
| Predicted Probability of Collapse | 0.07 | 0.25 | 0.60 | 0.99 | 0.99 | 0.06 | 0.38 |
